# Supplementary material for: Tissue-Specific Proteome and Subcellular Microscopic Analyses Reveal the Effect of High Salt Concentration on Actin Cytoskeleton and Vacuolization in Aleurone Cells during Early Germination of Barley
Source: MDPI journal article supplement (doi:10.3390/ijms22179642), 2021-09-06
Supplement: s1 [file s1]

## Figures Supplement

Figure Supplement 1:

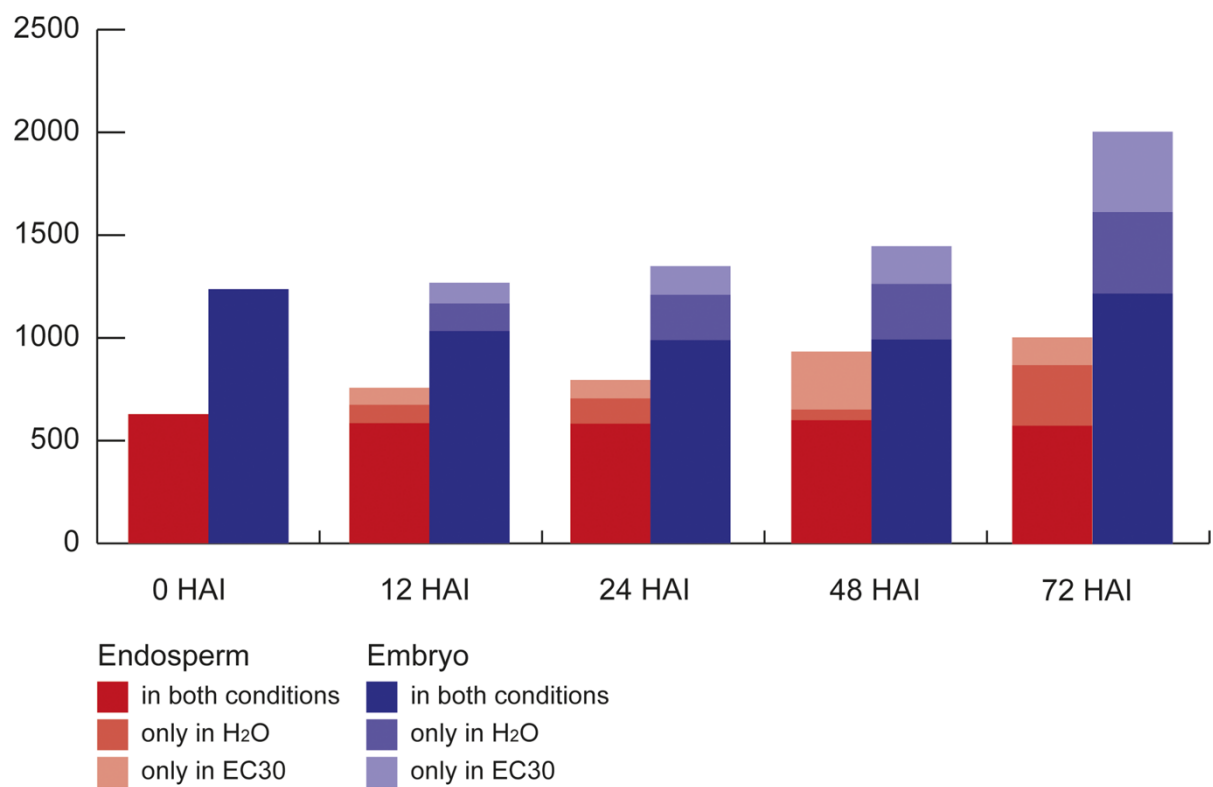

**Figure Supplement 1.** The number of identified proteins in H<sub>2</sub>O and in the EC30 condition.

Figure Supplement 2:

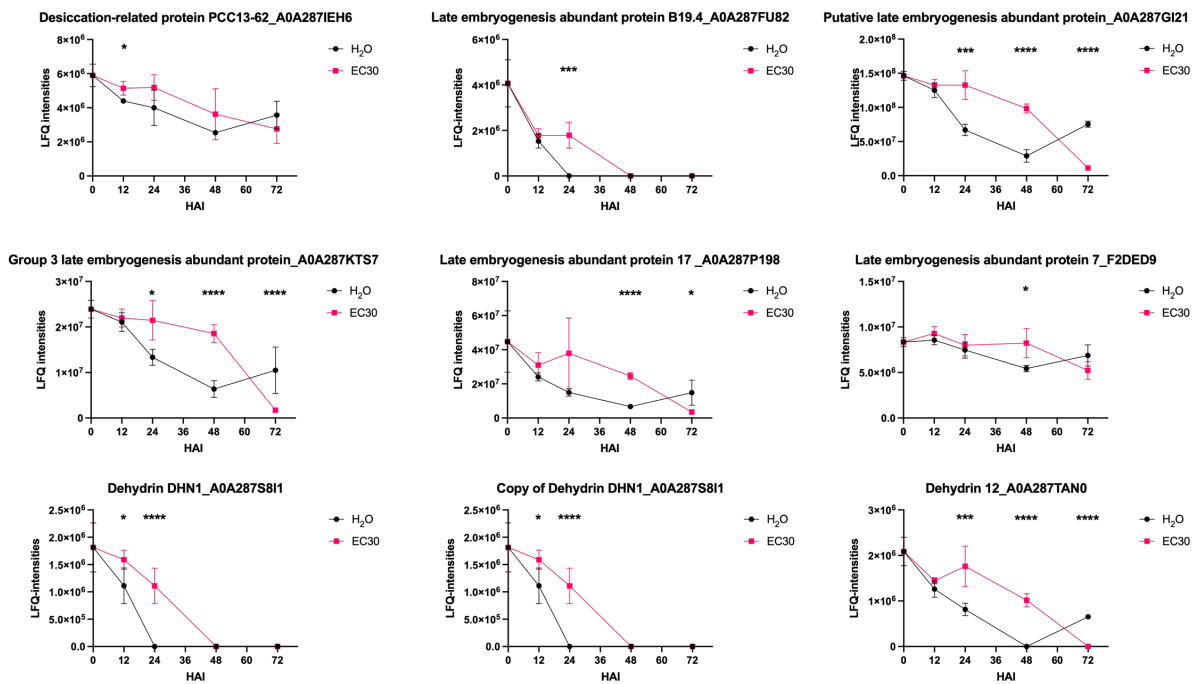

**Figure Supplement 2:** The protein abundance of LEA proteins at distinct stages during germination within the embryo. Within these points of time, the protein abundance is significantly different between H<sub>2</sub>O and EC30. Statistical analyses: multiple-unpaired t-test; significance is indicated with \* (p-value  $\leq 0.03$ ), \*\*\* (p-value  $\leq 0.0002$ ), and \*\*\*\* (p-value  $\leq 0.0001$ ).

Figure Supplement 3:

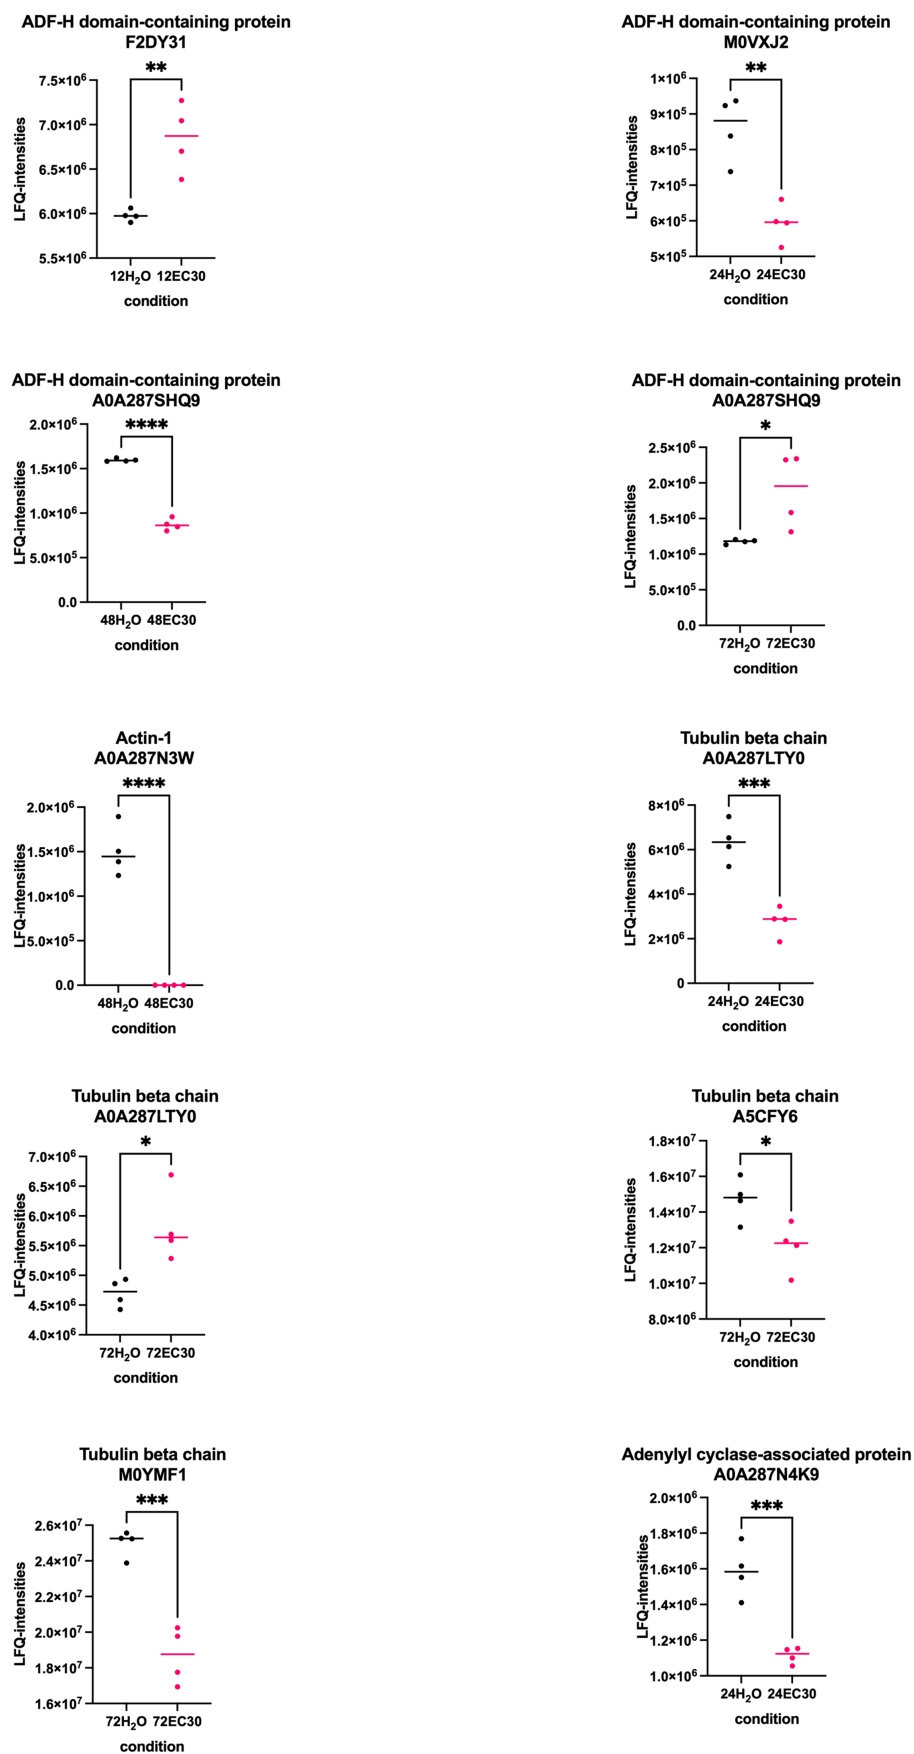

**Figure Supplement 3:** The protein abundance of cytoskeleton-related proteins at distinct stages during germination of the embryo. Within these points in time, the protein abundance is significantly different between

H<sub>2</sub>O and EC30. Statistical analyses: multiple-unpaired t-test; significance is indicated with \* (p-value  $\leq$  0.03), \*\* (p-value  $\leq$  0.01), \*\*\* (p-value  $\leq$  0.0002), and \*\*\*\* (p-value  $\leq$  0.0001)

Figure Supplement 4:

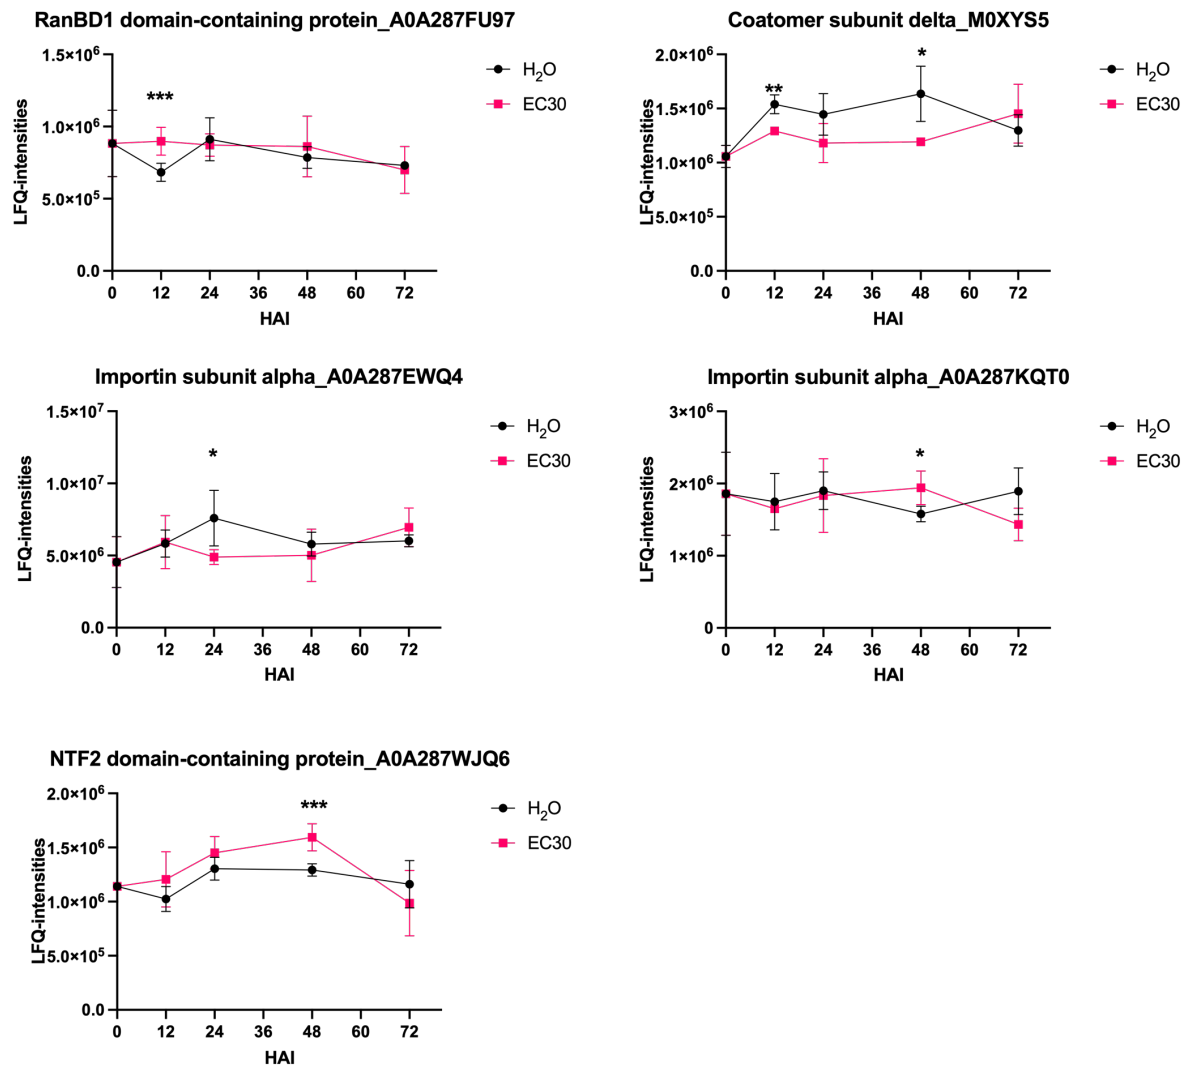

**Figure Supplement 4:** The protein abundance of protein trafficking-related proteins during germination of in the embryo. Within these points in time, the protein abundance is significantly different between H<sub>2</sub>O and EC30. Statistical analyses: multiple-unpaired t-test; significance is indicated with \* (p-value ≤ 0.03), and \*\*\* (p-value ≤ 0.0002),
